# Supplementary material for: p53 Dependent Centrosome Clustering Prevents Multipolar Mitosis in Tetraploid Cells
Source: PLOS journal article supplement (doi:10.1371/journal.pone.0027304), 2011-11-04
Supplement: S4 (10.1371/journal.pone.0027304.s004) [file journal.pone.0027304.s004]

**Supplementary table 2. Centrosome behavior of MEF cells with four centrosomes**

|                        | No. of cells<br>analyzed | Mean±SD              |                       |                      |
|------------------------|--------------------------|----------------------|-----------------------|----------------------|
|                        |                          | C value <sup>a</sup> | CI value <sup>b</sup> | I value <sup>c</sup> |
| p53 <sup>+/+</sup> MEF | 177                      | 1.91±0.25            | 1.78±0.32             | 0.07±0.14            |
| p53 <sup>-/-</sup> MEF | 308                      | 1.66±0.39 *          | 1.53±0.40 *           | 0.07±0.14            |

\* p<0.001, t-test, compared with MEF p53<sup>+/+</sup> cells.

<sup>a</sup> C value ( the number of centrosomes / the number of spindle poles) indicates the ability of maintaining bipolar spindle in cells with extra centrosomes;

<sup>b</sup> CI value (the number of activated centrosomes / the number of spindle poles) indicates the ability of clustering centrosomes in cells with extra centrosomes;

<sup>c</sup> I value (the number of inactivated centrosomes / the number of total centrosomes) indicates the ability of inactivating extra centrosomes in cells with extra centrosomes.
